# Supplementary material
Source: publisher site journal article supplement (https://www.dovepress.com/article/287741)
Supplement: Supplementary file 1 [file get_supplementary_file.php]

# **Appendix guide for the interpretation of the total DREEM and the five DREEM subscales and 50 items.3,4,36,37**

| DREEM, Subscales & Items | Score | Interpretation |
| --- | --- | --- |
| **Appendix A: Guide to interpret Total overall DREEM scores** | | |
| DREEM | 0-50 | Very poor |
| 51-100 | Plenty of problems |
| 101-150 | More positive than negative |
| 151-200 | Excellent |
| **Appendix-B: Guide to interpret DREEM subscale scores** | | |
| SPL / 12 | 0-12 | Very poor |
| 13-24 | Teaching is viewed negatively |
| 25-36 | More positive perception |
| 37-48 | Teaching is highly thorough |
| SPT /11 | 0-11 | Abysmal |
| 12-22 | In need of some retraining |
| 23-33 | Moving in the right direction |
| 34-44 | Model course organizers |
| SAP /8 | 0-8 | Feeling of total failure |
| 9-16 | Many negative aspects |
| 17-24 | Feeling more on the positive side |
| 25-32 | Confident |
| SPA /12 | 0-12 | A terrible environment |
| 13-24 | There are many issues that need changing |
| 25-36 | A more positive attitude |
| 37-48 | A good feeling overall |
| SSSP /7 | 0-7 | Miserable |
| 8-14 | Not a nice place |
| 15-21 | Not too bad |
| 22-28 | Very good socially |
| **Appendix- C: Guide to interpret DREEM-Item** | | |
| Induvial items score | ≤ 2 or less | Problem areas |
| ↔ 2-3 | Aspect of climate that could be enhanced |
| ≥3 | Real positive point |

(SPL) Students’ perceptions of learning, (SPT) Students’ perceptions of course organizers, (SASP) Students’ academic self-perceptions, (ASP) Students’ perceptions of atmosphere, Students’ social self-perception (SSSP). ≤- equal or less than; ↔ - between; ≥ - equal or more than
